# Supplementary material
Source: ML conference proceedings conference paper supplement (https://proceedings.mlr.press/v119/fahrbach20a.html)
Supplement: Supplementary file 1 [file fahrbach20a-supp.pdf]

## A. Closure of SDDM Matrices under Schur complement

**Lemma A.1.** *If  $\mathbf{M}$  is an SDDM matrix and  $T = V \setminus \{x\}$  is a subset of its columns, then  $\mathbf{S} := \mathbf{SC}(\mathbf{M}, T)$  is also an SDDM matrix.*

*Proof.* Recall that

$$\mathbf{SC}(\mathbf{M}, T) = \mathbf{M}_{T,T} - \frac{\mathbf{M}_{T,x}\mathbf{M}_{T,x}^\top}{\mathbf{D}'_{x,x}}$$

and observe that  $\mathbf{D}'_{x,x} = \mathbf{M}_{x,x}$ . By definition of SDDM matrices, we need to show that  $\mathbf{S}$  is (i) symmetric, (ii) its off-diagonal entries are non-positive and (iii) for all  $i \in [n-1]$  we have  $\mathbf{S}_{ii} \geq -\sum_{j \neq i} \mathbf{S}_{ij}$ . An easy inspection shows that  $\mathbf{S}$  satisfies (i) and (ii). We next show that (iii) holds.

To this end, by definition of  $\mathbf{S}$ , we have that

$$\begin{aligned} -\sum_{j \neq i} \mathbf{S}_{ij} &= \sum_{j \neq i} \left( -\mathbf{M}_{ij} + \frac{\mathbf{M}_{ix}\mathbf{M}_{xj}}{\mathbf{M}_{xx}} \right) \\ &= -\sum_{j \neq i} \mathbf{M}_{ij} + \frac{\mathbf{M}_{ix}}{\mathbf{M}_{xx}} \left( \sum_{j \neq i} \mathbf{M}_{xj} \right) \end{aligned} \quad (9)$$

As  $\mathbf{M}$  is an SDDM matrix, the following inequality holds for the  $x$ -th row of  $\mathbf{M}$

$$-\sum_{j \neq i} \mathbf{M}_{xj} \leq \mathbf{M}_{ix},$$

or equivalently

$$\mathbf{M}_{ix} \left( \sum_{j \neq i} \mathbf{M}_{xj} \right) \leq -\mathbf{M}_{ix}^2. \quad (10)$$

Plugging Eq. (10) in Eq. (9) and using the fact that  $-\sum_{j \neq i} \mathbf{M}_{ij} \leq \mathbf{M}_{ii}$ , we get that

$$-\sum_{j \neq i} \mathbf{S}_{ij} \leq \mathbf{M}_{ii} - \frac{\mathbf{M}_{ix}^2}{\mathbf{M}_{xx}} = \mathbf{S}_{ii},$$

which completes the proof of the lemma.  $\square$
